# Supplementary material for: pH-Dependent formation of (6,3) and (10,3) hydrogen-bonded networks based on [Ru(H2biim)3]SO4: polymorphs and topological isomers
Source: Royal Society of Chemistry journal article supplement (doi:10.1039/b819646j), 2009-01-01
Supplement: b819646j.pdf [file b819646j.pdf]

# pH-Dependent formation of (6,3) and (10,3) hydrogen-bonded networks based on [Ru(H<sub>2</sub>biim)<sub>3</sub>]SO<sub>4</sub>: polymorphs and topological isomers

*Li-Fei Yang, Man-Li Cao, Hao-Jun Mo, Hong-Guo Hao, Jin-Ji Wu, Jie-Peng Zhang, and Bao-Hui Ye\**

MOE Laboratory of Bioinorganic and Synthetic Chemistry, School of Chemistry and Chemical  
Engineering, Sun Yat-Sen University, Guangzhou 510275, China.

E-mail: cesybh@mail.sysu.edu.cn (B.-H. Ye)

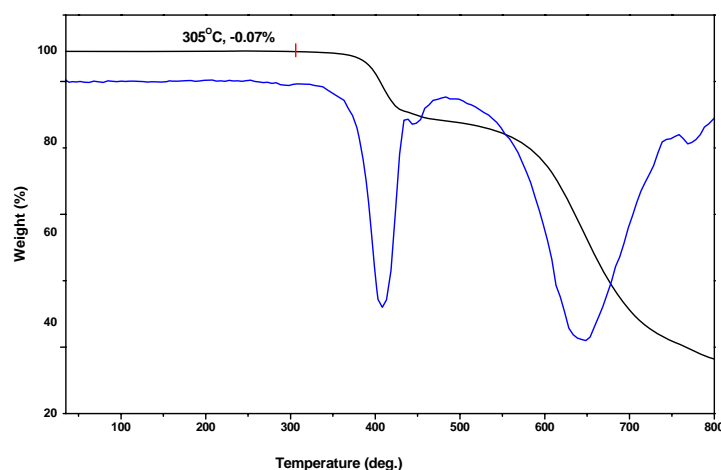

**Figure S1.** TGA of complex 1.

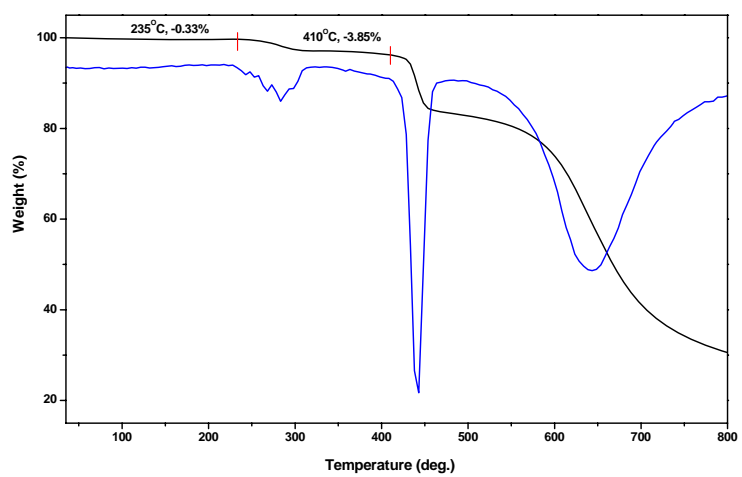

**Figure S2.** TGA of complex 2.
